# Supplementary material
Source: ML conference proceedings conference paper supplement (https://proceedings.mlr.press/v139/zhang21k.html)
Supplement: Supplementary file [file zhang21k-supp.pdf]

# Learning from Noisy Labels with No Change to the Training Process

## Supplementary Material

### A. Proof of Theorem 1

*Proof.* We use  $\langle \cdot, \cdot \rangle$  to denote the standard inner product.

$$\begin{aligned}
 & \text{regret}_D^{\mathbf{L}}[\widehat{h}] \\
 &= \mathbf{E}_X [\langle \boldsymbol{\eta}(X), \boldsymbol{\ell}_{\widehat{h}(X)} \rangle - \min_{y \in [n]} \langle \boldsymbol{\eta}(X), \boldsymbol{\ell}_y \rangle] \\
 &= \mathbf{E}_X [\max_{y \in [n]} \langle \boldsymbol{\eta}(X), \boldsymbol{\ell}_{\widehat{h}(X)} - \boldsymbol{\ell}_y \rangle] \\
 &= \mathbf{E}_X [\max_{y \in [n]} \langle (\mathbf{C}^\top)^{-1} \widetilde{\boldsymbol{\eta}}(X), \boldsymbol{\ell}_{\widehat{h}(X)} - \boldsymbol{\ell}_y \rangle] \\
 &= \mathbf{E}_X [\max_{y \in [n]} \langle \widetilde{\boldsymbol{\eta}}(X), \mathbf{C}^{-1}(\boldsymbol{\ell}_{\widehat{h}(X)} - \boldsymbol{\ell}_y) \rangle] \quad (\text{by property of adjoint}) \\
 &\leq \mathbf{E}_X [\max_{y \in [n]} \langle \widetilde{\boldsymbol{\eta}}(X) - \widehat{\boldsymbol{\eta}}(X), \mathbf{C}^{-1}(\boldsymbol{\ell}_{\widehat{h}(X)} - \boldsymbol{\ell}_y) \rangle] \\
 &\quad (\text{since by the definition of } \widehat{h}(X), \langle \widehat{\boldsymbol{\eta}}(X), \mathbf{C}^{-1}(\boldsymbol{\ell}_{\widehat{h}(X)} - \boldsymbol{\ell}_y) \rangle \leq 0 \forall y \in [n]) \\
 &\leq \mathbf{E}_X [\| \widehat{\boldsymbol{\eta}}(X) - \widetilde{\boldsymbol{\eta}}(X) \|_2 \cdot \| \mathbf{C}^{-1} \|_2 \cdot \max_{y \in [n]} \| \boldsymbol{\ell}_{\widehat{h}(X)} - \boldsymbol{\ell}_y \|_2] \\
 &\quad (\text{by Cauchy-Schwarz inequality}) \\
 &\leq 2 \max_{y \in [n]} \| \boldsymbol{\ell}_y \|_2 \cdot \| \mathbf{C}^{-1} \|_2 \cdot \mathbf{E}_X [\| \widehat{\boldsymbol{\eta}}(X) - \widetilde{\boldsymbol{\eta}}(X) \|_2]
 \end{aligned}$$

□

### B. Proof of Theorem 4

*Proof.* By Theorem 1, we have

$$\text{regret}_D^{\mathbf{L}}[\widehat{h}] \leq 2 \max_y \| \boldsymbol{\ell}_y \|_2 \cdot \| \mathbf{C}^{-1} \|_2 \cdot \mathbf{E}_X [\| \widehat{\boldsymbol{\eta}}(X) - \widetilde{\boldsymbol{\eta}}(X) \|_2]. \quad (3)$$

Then, since  $\psi$  is  $s$ -strongly proper composite with link function  $\boldsymbol{\lambda}$ , we have

$$\begin{aligned}
 & \text{regret}_D^{\psi}[\widehat{\mathbf{f}}] \\
 &= \mathbf{E}_X [\mathbf{E}_{Y|X \sim \widetilde{\boldsymbol{\eta}}(X)} [\psi(Y, \widehat{\mathbf{f}}(X))] - \inf_{\mathbf{u} \in \mathbb{R}^{n-1}} \mathbf{E}_{Y|X \sim \widetilde{\boldsymbol{\eta}}(X)} [\psi(Y, \mathbf{u})]] \\
 &= \mathbf{E}_X [\mathbf{E}_{Y|X \sim \widetilde{\boldsymbol{\eta}}(X)} [\psi(Y, \widehat{\mathbf{f}}(X)) - \psi(Y, \boldsymbol{\lambda}(\widetilde{\boldsymbol{\eta}}(X)))] \\
 &\quad (\text{by definition of strongly proper composite multiclass loss}) \\
 &\geq \mathbf{E}_X \left[ \frac{s}{2} \| \boldsymbol{\lambda}^{-1}(\widehat{\mathbf{f}}(X)) - \widetilde{\boldsymbol{\eta}}(X) \|_2^2 \right] \\
 &= \frac{s}{2} \mathbf{E}_X [\| \widehat{\boldsymbol{\eta}}(X) - \widetilde{\boldsymbol{\eta}}(X) \|_2^2] \quad (4)
 \end{aligned}$$

Combining Eqs. (3, 4), and applying Jensen's inequality (to the convex function  $x \mapsto x^2$ ) establishes the result.

□

### C. Proof of Lemma 3

*Proof.* We will show for all  $\mathbf{p} \in \Delta_n$  and  $\mathbf{u} \in \mathbb{R}^{n-1}$ ,

$$\mathbf{E}_{Y \sim \mathbf{p}} \left[ \psi_{\text{mlog}}(Y, \mathbf{u}) - \psi_{\text{mlog}}(Y, \boldsymbol{\lambda}_{\text{mlog}}(\mathbf{p})) \right] \geq \frac{1}{2} \|\boldsymbol{\lambda}_{\text{mlog}}^{-1}(\mathbf{u}) - \mathbf{p}\|_2^2.$$

Fix  $\mathbf{p} \in \Delta_n$  and  $\mathbf{u} \in \mathbb{R}^{n-1}$ . Then

$$\begin{aligned} & \mathbf{E}_{Y \sim \mathbf{p}} \left[ \psi_{\text{mlog}}(Y, \mathbf{u}) - \psi_{\text{mlog}}(Y, \boldsymbol{\lambda}_{\text{mlog}}(\mathbf{p})) \right] \\ &= - \sum_{i \in [n]} p_i \ln \left( (\boldsymbol{\lambda}_{\text{mlog}}^{-1}(\mathbf{u}))_i \right) + \sum_{i \in [n]} p_i \ln(p_i) \\ &= \sum_{i \in [n]} p_i \ln \left( \frac{p_i}{(\boldsymbol{\lambda}_{\text{mlog}}^{-1}(\mathbf{u}))_i} \right) \\ &= D_{KL}(\mathbf{p} \parallel \boldsymbol{\lambda}_{\text{mlog}}^{-1}(\mathbf{u})) \quad \text{by the definition of Kullback-Leibler divergence} \\ &\geq \frac{1}{2} \|\mathbf{p} - \boldsymbol{\lambda}_{\text{mlog}}^{-1}(\mathbf{u})\|_1^2 \quad \text{using Pinsker's inequality and properties of total variation distance} \\ &\geq \frac{1}{2} \|\mathbf{p} - \boldsymbol{\lambda}_{\text{mlog}}^{-1}(\mathbf{u})\|_2^2. \end{aligned}$$

□

### D. Proof of Theorem 5

*Proof. Part 1 (Sufficiency).*

Suppose **C** satisfies the given sufficient condition, i.e. that

$$\gamma_{\tilde{y}, \tilde{y}} > \gamma_{y, \tilde{y}} \quad \forall y \neq \tilde{y}.$$

We will show that

$$\operatorname{argmax}_x \eta_y(x) = \operatorname{argmax}_x \tilde{\eta}_y(x) \quad \forall y \in [n];$$

the claim will then follow.

Fix any class  $y \in [n]$ .

First, suppose  $x' \in \operatorname{argmax}_x \eta_y(x)$ . Then by assumption (A), it must be the case that  $\eta_y(x') = 1$ , i.e. that  $\boldsymbol{\eta}(x') = \mathbf{e}_y$ . This gives

$$\tilde{\eta}_y(x') = (\mathbf{C}^\top \boldsymbol{\eta}(x'))_y = (\mathbf{C}^\top \mathbf{e}_y)_y = \gamma_{y,y}.$$

Now for any  $x \in \mathcal{X}$ , we have

$$\tilde{\eta}_y(x) = (\mathbf{C}^\top \boldsymbol{\eta}(x))_y = \sum_{y'=1}^n \gamma_{y',y} \eta_{y'}(x) \leq \sum_{y'=1}^n \gamma_{y,y} \eta_{y'}(x) = \gamma_{y,y} = \tilde{\eta}_y(x').$$

Thus  $x' \in \operatorname{argmax}_x \tilde{\eta}_y(x)$ . This establishes  $\operatorname{argmax}_x \eta_y(x) \subseteq \operatorname{argmax}_x \tilde{\eta}_y(x)$ .

Conversely, suppose  $x' \in \operatorname{argmax}_x \tilde{\eta}_y(x) = \operatorname{argmax}_x (\mathbf{C}^\top \boldsymbol{\eta}(x))_y$ . This means

$$\sum_{y'=1}^n \gamma_{y',y} \eta_{y'}(x') \geq \sum_{y'=1}^n \gamma_{y',y} \eta_{y'}(x) \quad \forall x \in \mathcal{X}.$$

By assumption (A), there exists  $\bar{x}^y \in \mathcal{X}$  such that  $\boldsymbol{\eta}(\bar{x}^y) = \mathbf{e}_y$ . Applying the above inequality to  $x = \bar{x}^y$ , we have

$$\sum_{y'=1}^n \gamma_{y',y} \eta_{y'}(x') \geq \sum_{y'=1}^n \gamma_{y',y} \eta_{y'}(\bar{x}^y) = \gamma_{y,y}.$$

Moreover, we have

$$\sum_{y'=1}^n \gamma_{y',y} \eta_{y'}(x') \leq \gamma_{y,y}.$$

Combining the above two inequalities, we get

$$\sum_{y'=1}^n \gamma_{y',y} \eta_{y'}(x') = \gamma_{y,y}.$$

Since  $\gamma_{y',y} < \gamma_{y,y}$  for all  $y' \neq y$ , this means we must have  $\boldsymbol{\eta}(x') = \mathbf{e}_y$ . Thus,  $x' \in \operatorname{argmax}_x \eta_y(x)$ . This establishes  $\operatorname{argmax}_x \tilde{\eta}_y(x) \subseteq \operatorname{argmax}_x \eta_y(x)$ .

## Part 2 (Necessity).

Suppose that  $\mathbf{C}$  fails to satisfy the given necessary condition, i.e. that there exist  $y \neq \tilde{y}$  such that

$$\gamma_{\tilde{y},\tilde{y}} < \gamma_{y,\tilde{y}}.$$

We will show that  $\operatorname{argmax}_x \eta_{\tilde{y}}(x) \neq \operatorname{argmax}_x \tilde{\eta}_{\tilde{y}}(x)$ .

We give a proof by contradiction. In particular, let if possible  $\operatorname{argmax}_x \eta_{\tilde{y}}(x) = \operatorname{argmax}_x \tilde{\eta}_{\tilde{y}}(x) = \operatorname{argmax}_x (\mathbf{C}^\top \boldsymbol{\eta}(x))_{\tilde{y}}$ .

By assumption (A), there exists  $\bar{x}^{\tilde{y}} \in \mathcal{X}$  such that  $\boldsymbol{\eta}(\bar{x}^{\tilde{y}}) = \mathbf{e}_{\tilde{y}}$ , so this means  $\bar{x}^{\tilde{y}} \in \operatorname{argmax}_x \eta_{\tilde{y}}(x) = \operatorname{argmax}_x \tilde{\eta}_{\tilde{y}}(x) = \operatorname{argmax}_x (\mathbf{C}^\top \boldsymbol{\eta}(x))_{\tilde{y}}$ . This means

$$\gamma_{\tilde{y},\tilde{y}} = \sum_{y'=1}^n \gamma_{y',\tilde{y}} \eta_{y'}(\bar{x}^{\tilde{y}}) \geq \sum_{y'=1}^n \gamma_{y',\tilde{y}} \eta_{y'}(x) \quad \forall x \in \mathcal{X}.$$

But by assumption (A), we can also find  $\bar{x}^y \in \mathcal{X}$  such that  $\boldsymbol{\eta}(\bar{x}^y) = \mathbf{e}_y$ . Applying the above inequality to  $x = \bar{x}^y$  then gives

$$\gamma_{\tilde{y},\tilde{y}} \geq \sum_{y'=1}^n \gamma_{y',\tilde{y}} \eta_{y'}(\bar{x}^y) = \gamma_{y,\tilde{y}},$$

contradicting our assumption. Therefore, we must have  $\operatorname{argmax}_x \eta_{\tilde{y}}(x) \neq \operatorname{argmax}_x \tilde{\eta}_{\tilde{y}}(x)$ .  $\square$

## E. Additional Experimental Details

Table 3. Details of MNIST and CIFAR10 data sets.

| Data set | # train | # test | # classes<br>( $n$ ) | # features<br>( $d$ ) |
|----------|---------|--------|----------------------|-----------------------|
| MNIST    | 60,000  | 10,000 | 10                   | 784                   |
| CIFAR10  | 50,000  | 10,000 | 10                   | 3072                  |

For MNIST, the asymmetric noise matrix  $\mathbf{C}^{\text{MNIST}(\gamma)}$  includes the following label noise transitions:  $2 \rightarrow 7$ ,  $3 \rightarrow 8$ ,  $5 \leftrightarrow 6$ ,  $7 \rightarrow 1$ . Following [Patrini et al. \(2017\)](#), features were normalized to  $[0, 1]$ , and two fully connected hidden layers of size 128 were trained, with ReLU activation and dropout rate 0.2.<sup>13</sup>

For CIFAR10, the asymmetric noise matrix  $\mathbf{C}^{\text{CIFAR10}(\gamma)}$  includes the following label noise transitions: Truck  $\rightarrow$  Automobile, Bird  $\rightarrow$  Airplane, Deer  $\rightarrow$  Horse, Cat  $\leftrightarrow$  Dog. Again following [Patrini et al. \(2017\)](#), per-pixel mean subtraction and data augmentation were performed, and a 14-layer residual network (ResNet) ([He et al., 2016](#)) was trained.<sup>14</sup>

<sup>13</sup>Batch size was 32. AdaGrad ([Duchi et al., 2010](#)) was run for 40 epochs with default parameters.

<sup>14</sup>Batch size was 32. SGD was run for 120 epochs with momentum 0.9 and learning rate set to 0.1 initially and divided by 10 after 40 and 80 epochs; weight decay was  $10^{-4}$ .
